# Supplementary material
Source: PubMed Central journal article supplement (PMC4900224)
Supplement: Supp_Figure1.pdf [file Supp_Figure1.pdf]

## Supplementary Data

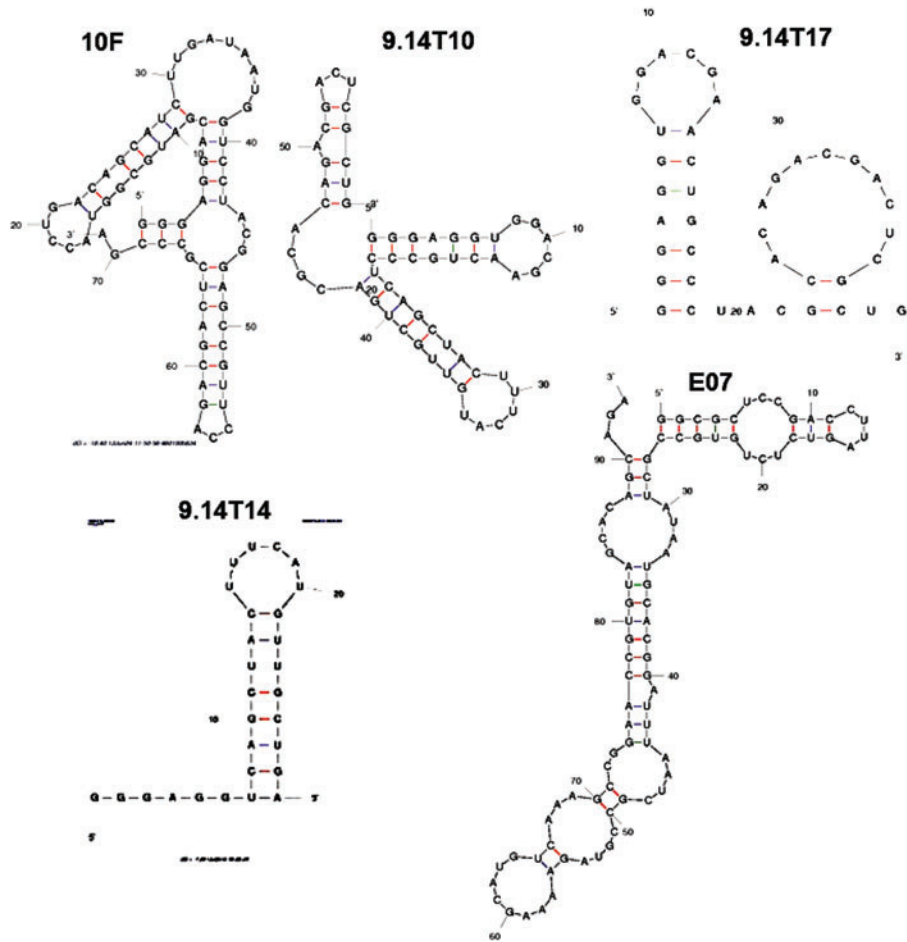

**SUPPLEMENTARY FIG. S1.** Secondary structures of RNAs. Mfold (<http://mfold.rna.albany.edu/?q=mfold/RNA-Folding-Form>)-predicted structures with the lowest free energy ( $\Delta G$ ) are shown.
