# Supplementary material
Source: PubMed Central journal article supplement (PMC4900224)
Supplement: Supp_Table1.pdf [file Supp_Table1.pdf]

SUPPLEMENTARY TABLE S1. RNA SEQUENCES

| <i>RNA</i>        | <i>Length</i> | <i>Target</i>                       | <i>Sequence</i>                                                                                                                                              |
|-------------------|---------------|-------------------------------------|--------------------------------------------------------------------------------------------------------------------------------------------------------------|
| 10F               | 71            | Melanoma/melanocyte                 | GGGAGGACGAUGCGGUACCUGACAGCAUCUU<br>GAUAAUGGUCCUACGGAGCCGUUCCAGACGA<br>CUCGCCCCGA                                                                             |
| E07               | 93            | Epidermal growth<br>factor receptor | GGCGCUCGACCUUAGUCUCUGUGCCG<br>CUAUA AUGCACGGAUUUAUCGCCGUA<br>GAAAAGCAUGUCAAGCCGGAACCGUGUAGCA<br>CAGCAGA                                                      |
| 9.14T10           | 60            | vWF                                 | GGGAGGUGGACGAACUGCCCCUCAGCUACUUUCAU<br>GUUGCUGACGCACAGACGACUCGCUG                                                                                            |
| 9.14T17           | 40            | vWF                                 | GGGAGGUGGACGAACUGCCCCUACGCACAGACGA<br>CUCGCUG                                                                                                                |
| 9.14T14           | 28            | vWF                                 | GGGAGGUCAGCUACUUUCAUGUUGCUGA                                                                                                                                 |
| Poly(U)30         | 30            | None                                | UUUUUUUUUUUUUUUUUUUUUUUUUUUUUUUUUU                                                                                                                           |
| RNA-23 sense      | 23            | None                                | GGAUGCGGUACCUGACAGCAUCC                                                                                                                                      |
| RNA-23 antisense  | 23            | None                                | GGAUGCUGUCAGGUACCGCAUCC                                                                                                                                      |
| RNA-140 sense     | 140           | None                                | GGCUAUACUGCGGACUAAUUGGCAAAGGAAG<br>CAUUGACACAUGCGCCAAAUUUGCCUGCU<br>CUACCAAGGCAAUAGGAAGAACCAUCUUGAAA<br>GAGAAUAUCAAGUACGAAGUGGCCAUUUUU<br>GUCCAUGGACCAACUACC |
| RNA-140 antisense | 140           | None                                | GGUAGUUGGUCCAUGGACAAAAAUGGCCACUUC<br>GUACUUGAUAUUCUCUUUCAAGAUGGUUCUUC<br>CUAUUGCCUUGGUAGAGCAGGCAAUUUGGCG<br>CAUGUGUCA AUGCUUCCUUUGCCAAAUA<br>GUCCGCAGUAUAGCC |

vWF, von Willebrand factor.
